# Supplementary material for: p62 overexpression induces TDP-43 cytoplasmic mislocalisation, aggregation and cleavage and neuronal death
Source: PubMed Central journal article supplement (PMC8169680; doi:10.1038/s41598-021-90822-2), 2021-06-01
Supplement: 41598_2021_90822_MOESM1_ESM.pdf [file 41598_2021_90822_MOESM1_ESM.pdf]

**p62 overexpression induces TDP-43  
cytoplasmic mislocalisation, aggregation and  
cleavage and causes neuronal death**

Supplementary Figures

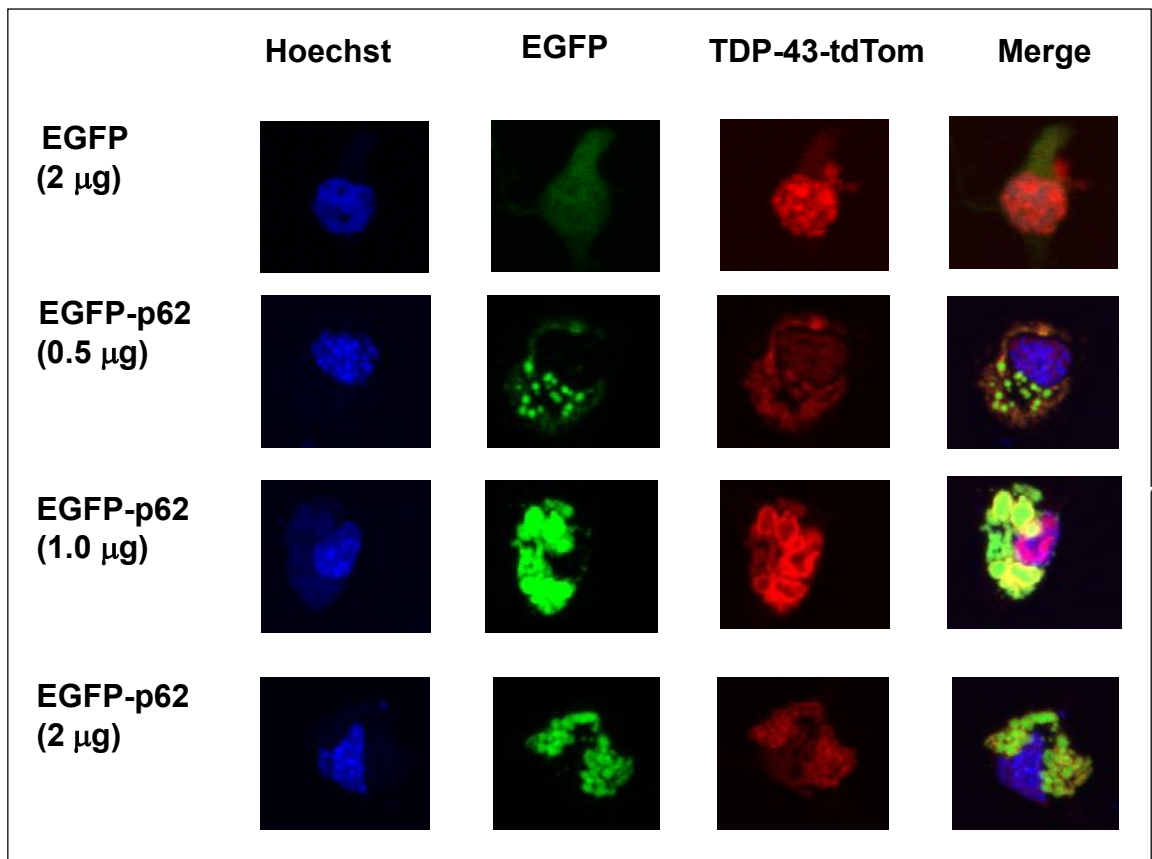

***Supplementary Figure 1. Increasing p62 leads to increased nuclear depletion of TDP-43.*** NSC-34 cells were transfected with EGFP or increasing amounts (0.5, 1 or 2  $\mu$ g) of EGFP-p62 and TDP-43-tdTomato. Image is representative of 3 independent experiments.

Soluble

Insoluble

Wild type   p.M337V

Wild type   p.M337V

A) Anti-RFP

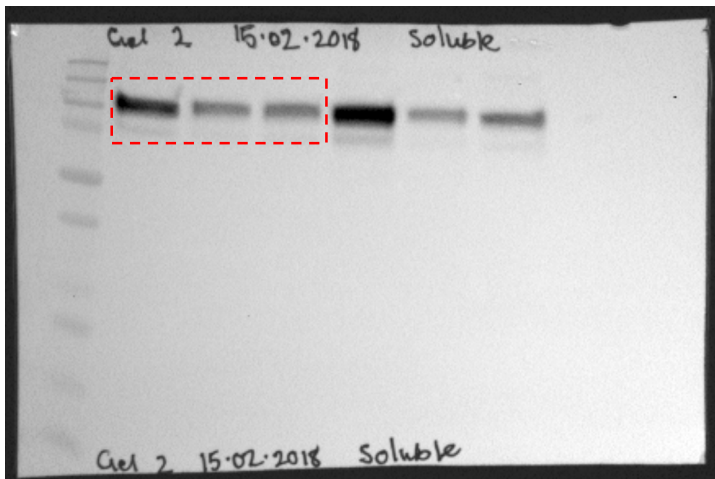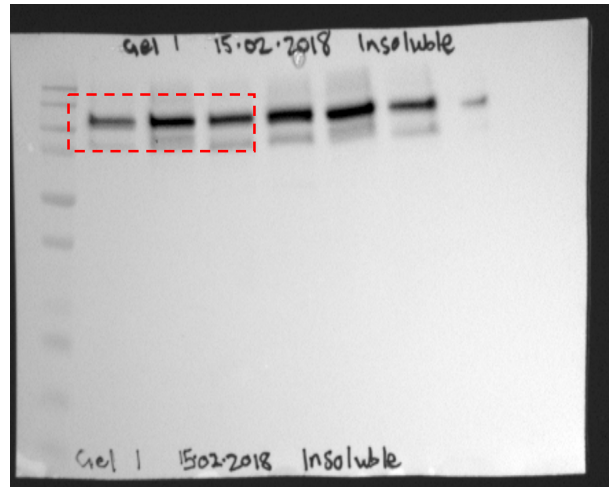

B) Anti-GFP

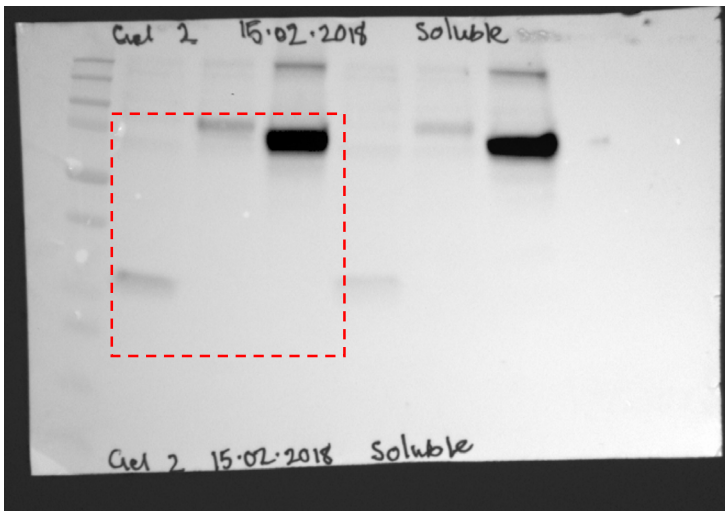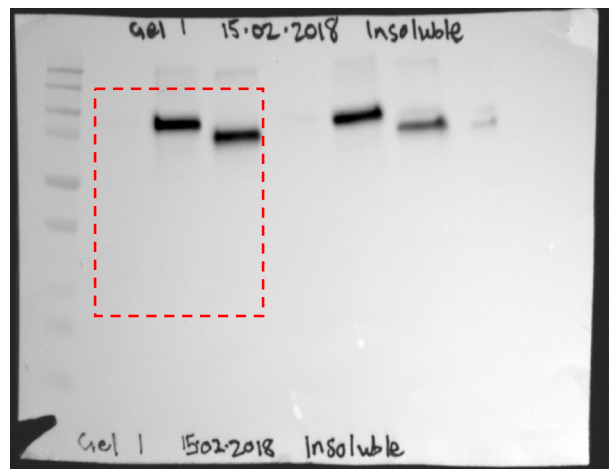

C) Anti  $\alpha$ -tubulin

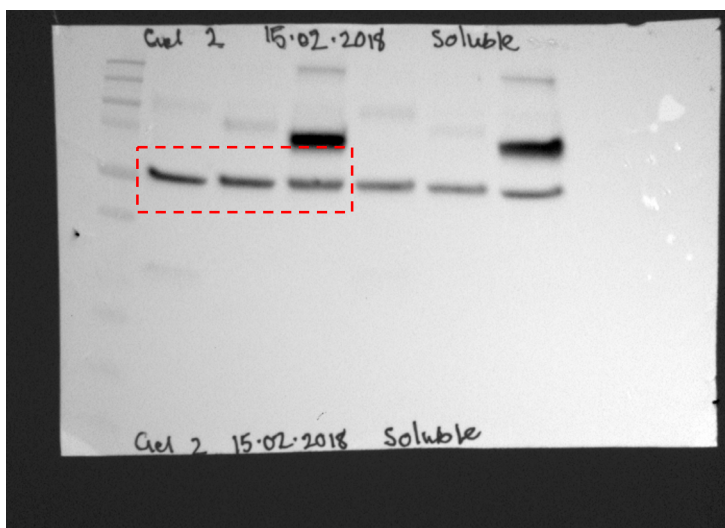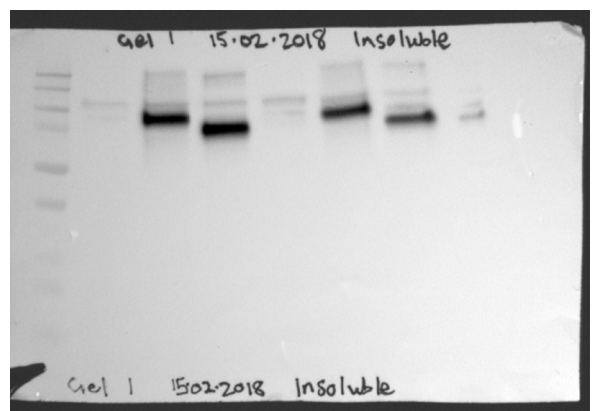

**Supplementary Figure 2. p62 expression alters TDP-43 solubility - blot images.** Lane order: Molecular weight marker, EV, EGFP-p62 wild type, EGFP-p62 dUBA – all with co-expressed TDP-43-tdTomato wild type, , EV, EGFP-p62 wild type, EGFP-p62 dUBA – all with co-expressed TDP-43-tdTomato p.M337V,. Please note Right hand side of blots depicting bands observed in TDP-43-tdTomato p.M337V were cropped out of final figures.

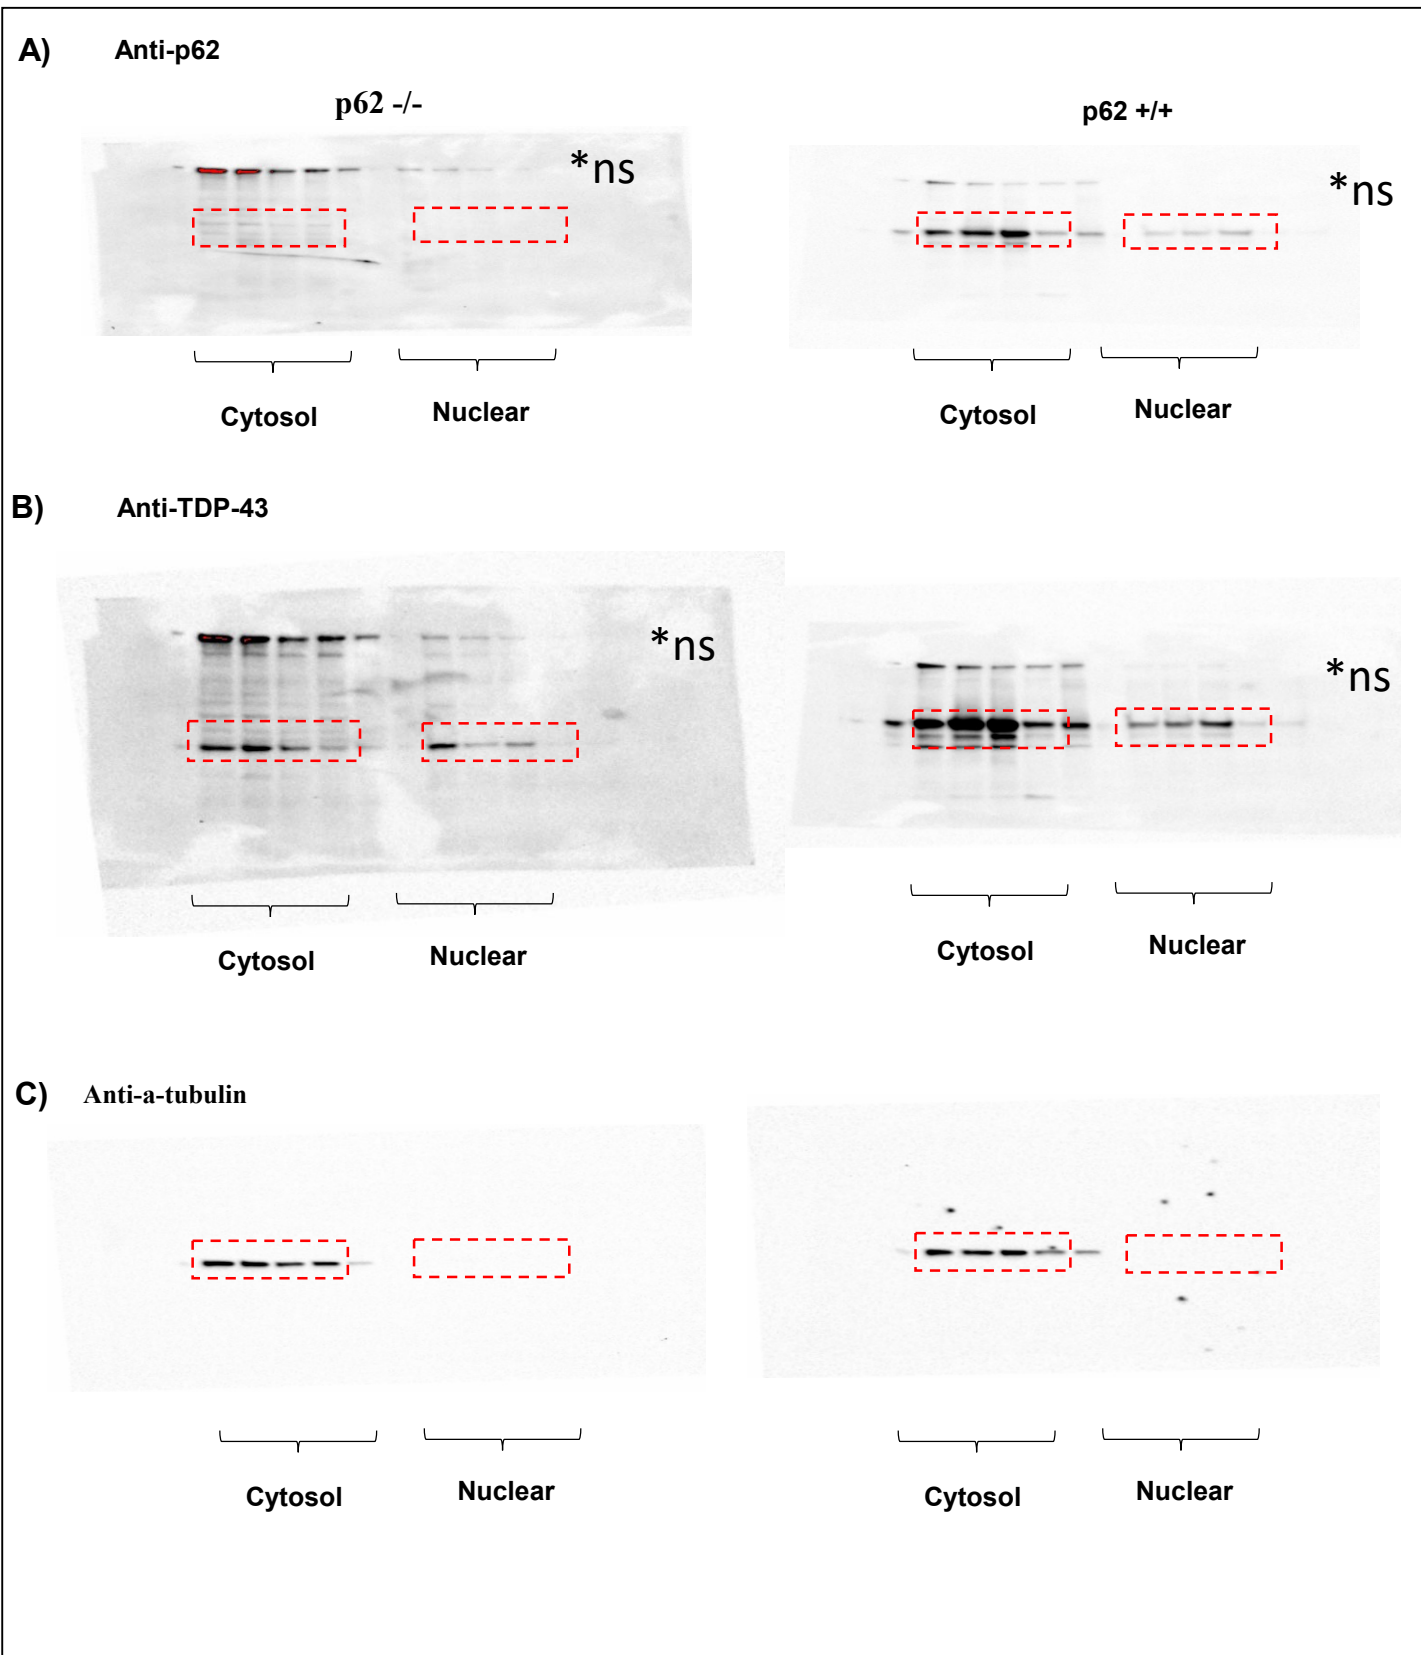

**Supplementary Figure 3. p62 alters the nuclear:cytoplasmic TDP-43 ratio – blot images.** Lane order Cytoplasmic: non-treated, MG132, AsNaO2, heat shock, Luperox (cropped out of final figure 3), nuclear fraction: non-treated, MG132, AsNaO2, heat shock, Luperox (cropped out of final figure 3). A) anti-p62, B) anti-TDP-43, C) anti- $\alpha$ -tubulin.

A) Anti-RFP

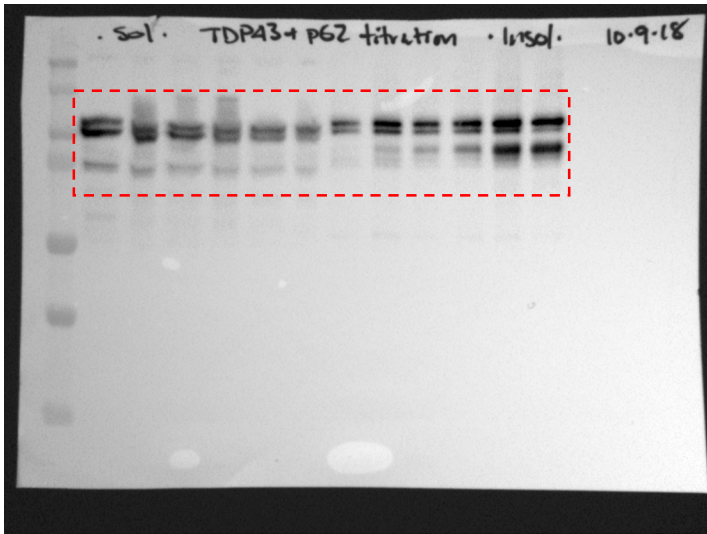

B) Anti-EGFP

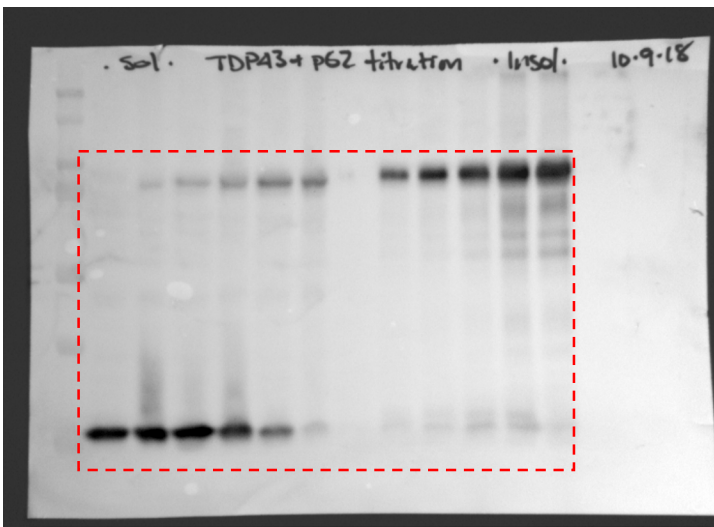

C) Anti- $\alpha$ -tubulin

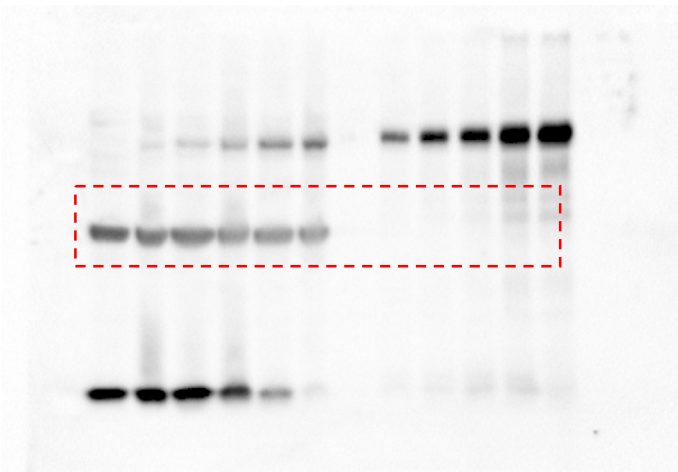

**Supplementary Figure 4. p62 expression induces TDP-43 cleavage to a 35-kDa fragment - blot images.** Lane order: soluble lysates from cells transfected with increasing amounts of EGFP-p62 (0, 0.25, 0.5, 1, 1.5 or 2 µg) and a corresponding decreasing amounts of EGFP (2, 1.75, 1.5, 1, 0.5 or 0 µg) along with a consistent amount of TDP-43-tdTomato, insoluble lysates in the same order. A) anti-RFP, B) anti-EGFP, C) anti- $\alpha$ -tubulin (not stripped after anti-EGFP).

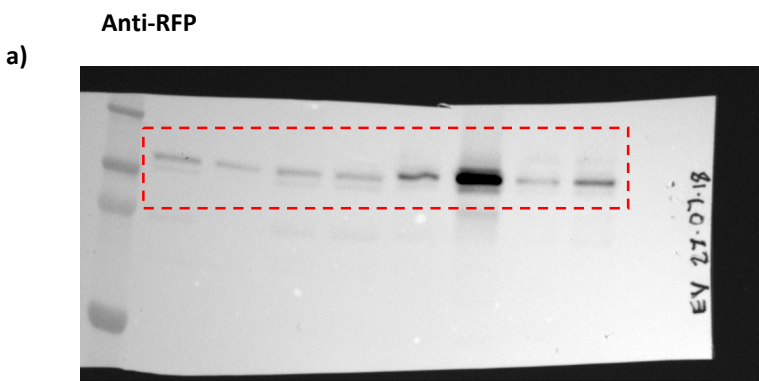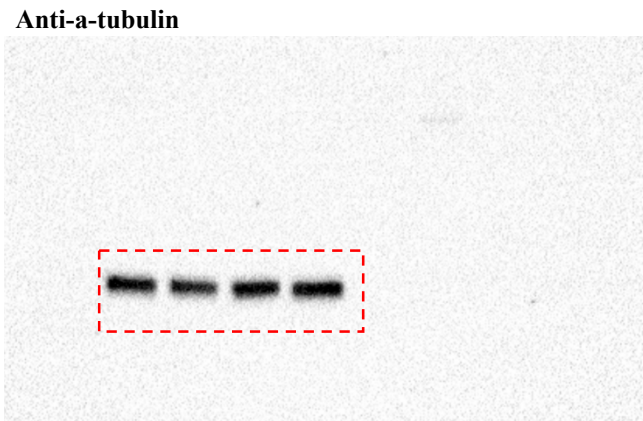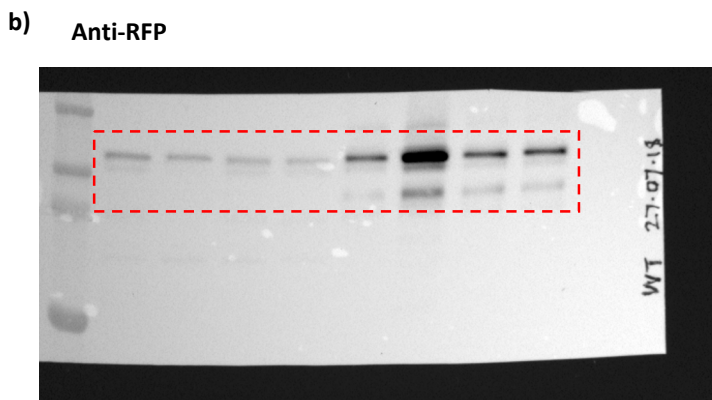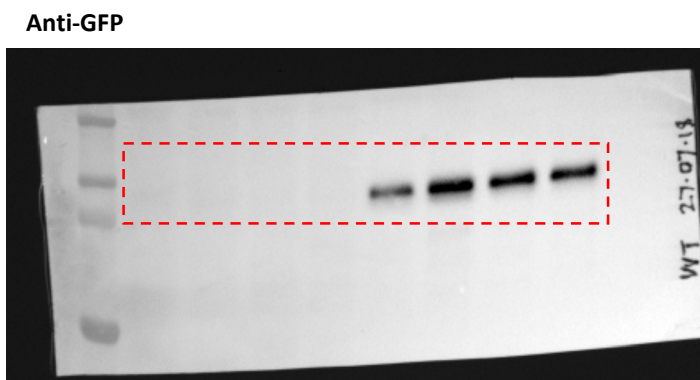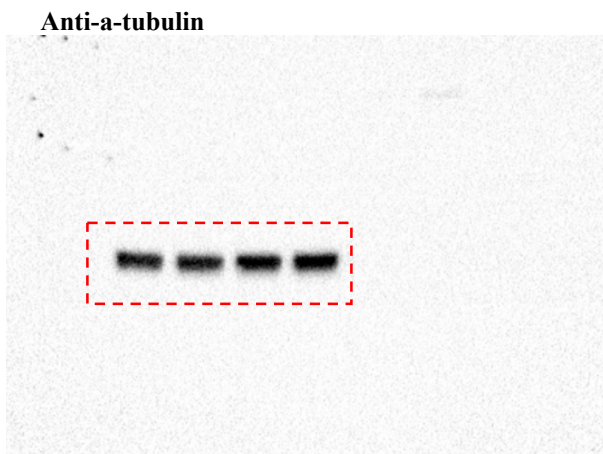

**Supplementary Figure 5. p62 creates a cleaved TDP-43 species that is also induced by proteasomal inhibition. - blot images.** A) Lane order: soluble fractions from cells transfected with pcDNA3.1 and TDP-43-tdTomato, non-treated, MG132, serum starved or serum starved and bafilomycin treated. Insoluble fractions from the same cells. B) Lane order: soluble fractions from cells transfected with EGFP-p62 and TDP-43-tdTomato, non-treated, MG132, serum starved or serum starved and bafilomycin treated. Insoluble fractions from the same cells. Anti-RFP (top panel), anti- $\alpha$ -tubulin (2<sup>nd</sup> panel), anti-RFP (3<sup>rd</sup> panel), anti-GFP (4<sup>th</sup> panel), anti- $\alpha$ -tubulin (bottom panel).

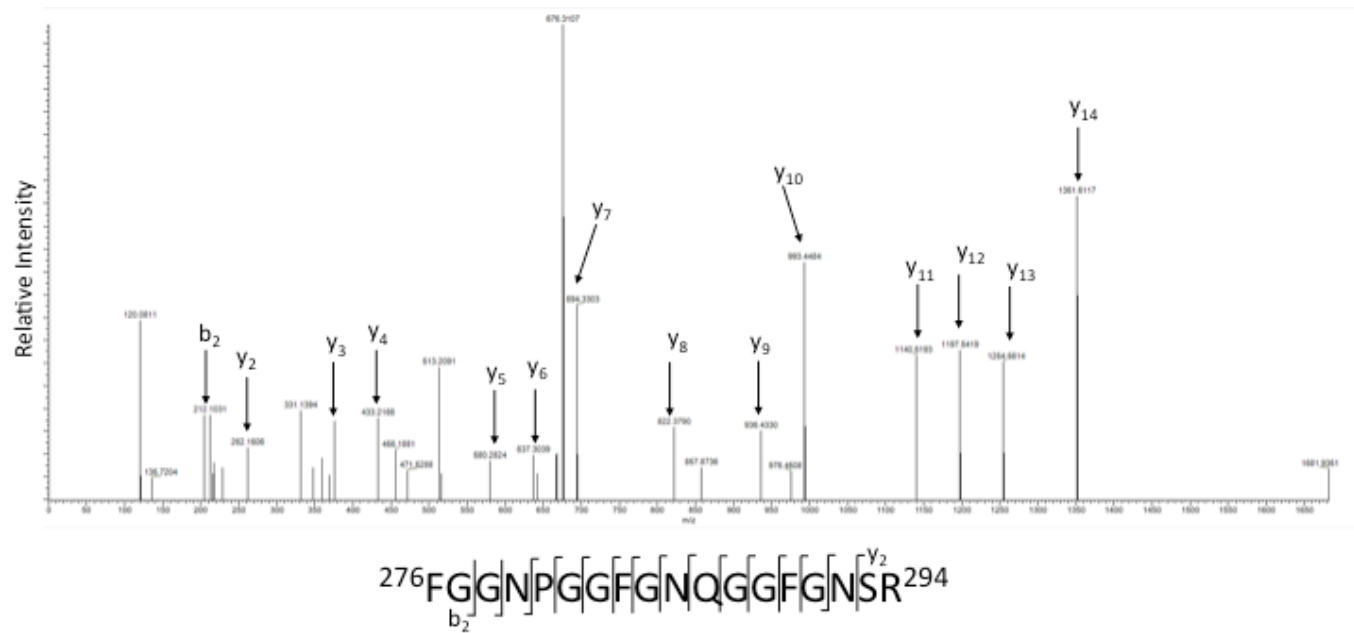

**Supplementary Figure 6. MS/MS fragmentation for tryptic peptide  $^{276}\text{FGGNP[GGFGN]QGGFGN[SR]}^{294}$  from 90 kDa tdTomato-TDP-43.**

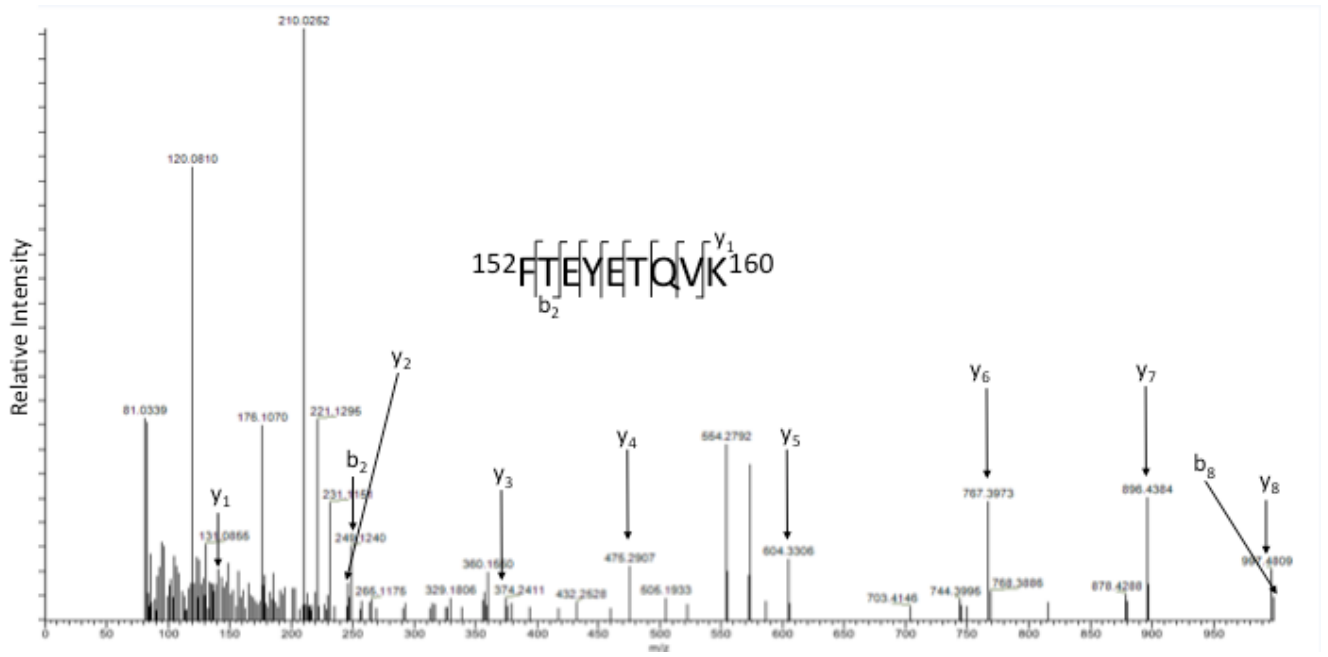

**Supplementary Figure 7. MS/MS fragmentation of tryptic peptide  $^{152}\text{FTEYETQVK}^{160}$  from 90 kDa tdTomato-TDP-43.**



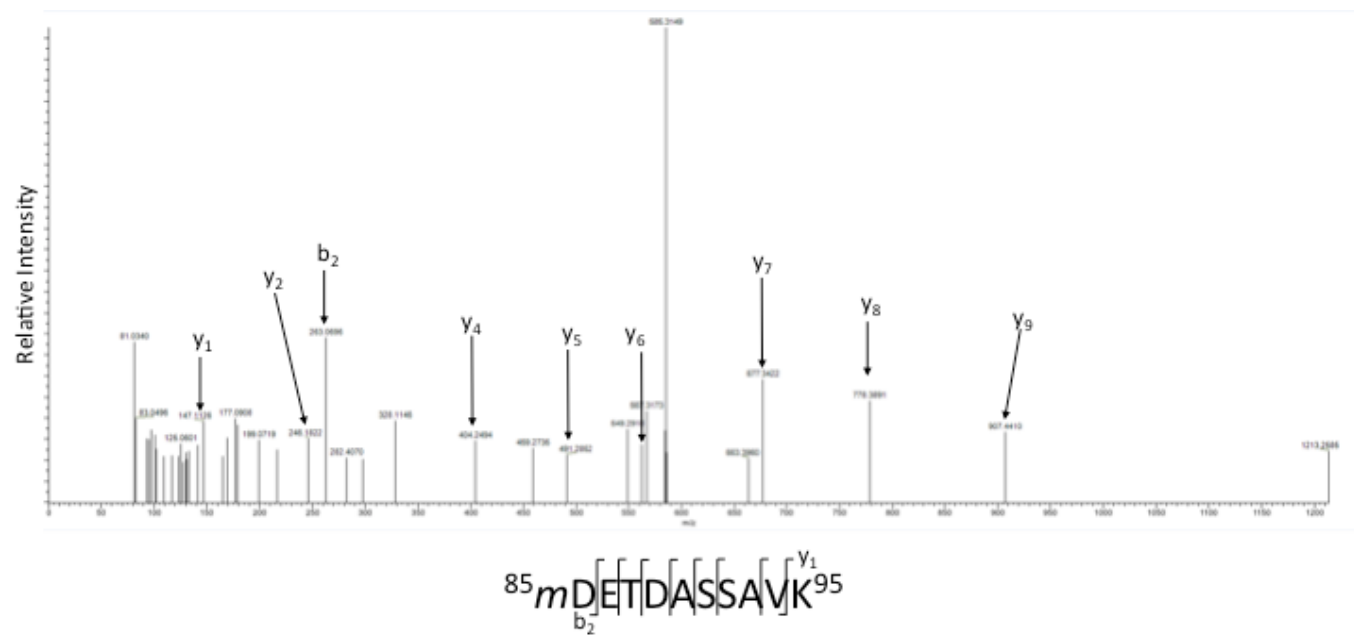

**Supplementary Figure 8. MS/MS fragmentation of tryptic peptide <sup>85</sup>mDETDASSAVK<sup>95</sup> from 90 kDa tdTomato-TDP-43.**

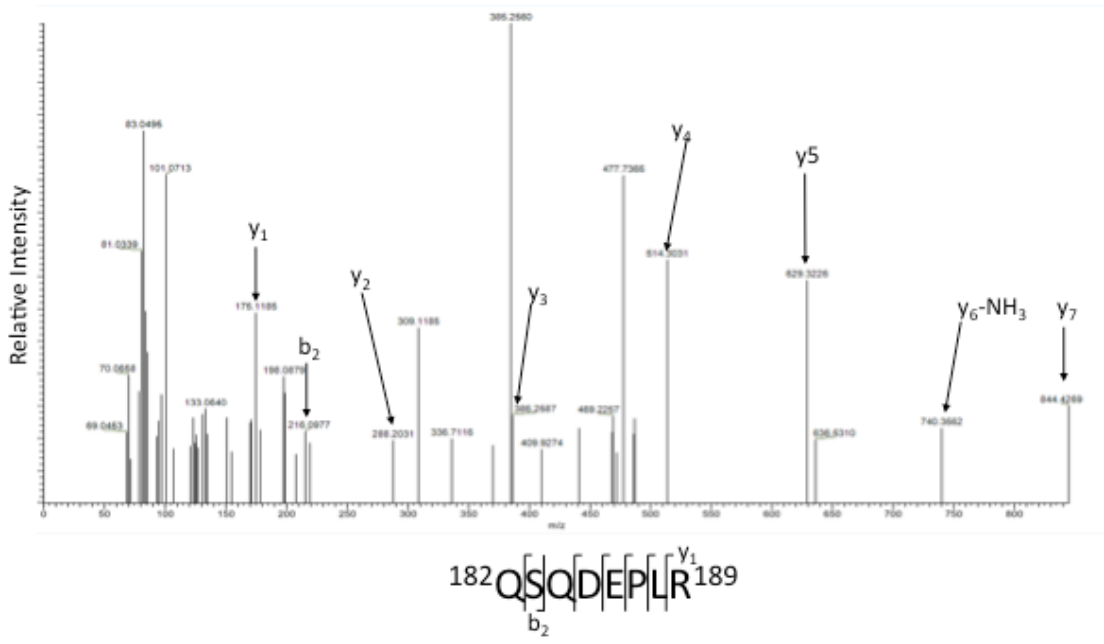

**Supplementary Figure 9. MS/MS fragmentation of tryptic peptide 182QSQDEPLR189 from 90 kDa tdTomato-TDP-43.**

Q13148 – TDP-43

| 1   | 11          | 21         | 31         | 41         | 51         | 61         | 71         | 81         | 91         |            |
|-----|-------------|------------|------------|------------|------------|------------|------------|------------|------------|------------|
| 1   | MSEYIRVTEDE | ENDEPIEIPS | EDDGTVLLST | VTAQFPGACG | LRYRNPVSC  | MRCVRLVEGI | LHAPDAGWGN | LVYVWNYPKD | NKRKMDETDA | SSAVKVKRAV |
| 101 | QKTSDLIVLG  | LPWKTTEQDL | KEYFSTFCEV | LMVQVKKDLK | TGHSKGFQV  | RFTXEYEQVK | VMSQRHMIDG | RWCDCCLPNS | KDSQDEPLRS | RKVEVGRCTE |
| 201 | DMTEDELREF  | FSQYGDVMDV | FIPKPFRAFA | FVTFADDQIA | QSLCCEDLLI | KGISVHISNA | EPKHNSNRQL | ERSGRFGGNP | GGFGNQGFG  | NSRGGGAGLG |
| 301 | NNQGSNMGGG  | MNFGAFSINP | AMMAAAQAAL | QSSWGMGMGL | ASQCNQSGPS | GNNQNCQNMQ | REPNOAFGSG | NNSYSGSNSG | AAIGWGSASN | AGSGSGFNNG |
| 401 | FGSSMDSKSS  | GWGM       |            |            |            |            |            |            |            |            |

**Supplementary Figure 10. LC-MS/MS analyses of a control HEK293 lysate to identify typical tryptic peptides from endogenous TDP-43 excised from a region on a protein gel ~37 kDa – 50 kDa, which contained coverage at the N-terminus of TDP-43.**

**A) Anti RFP**

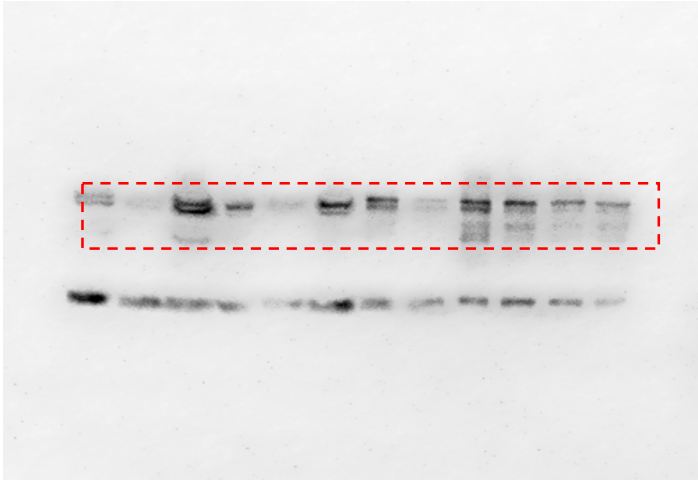

**B) Anti GFP**

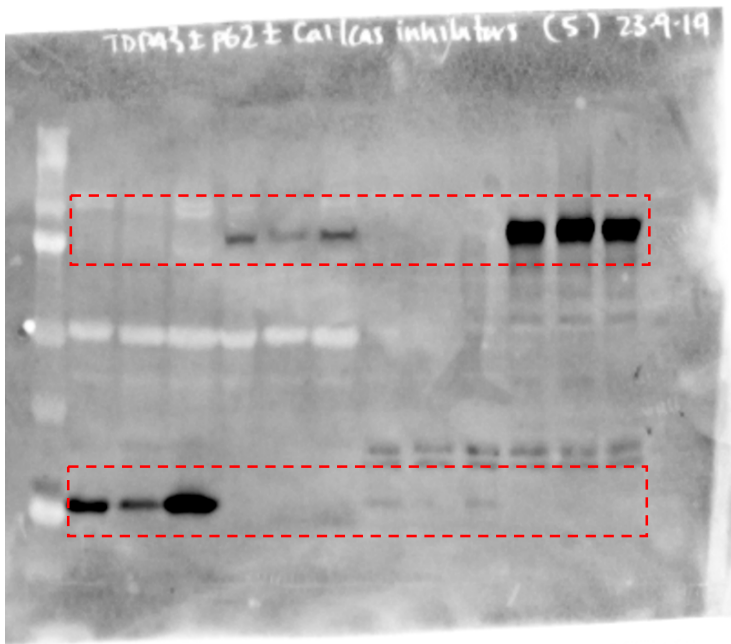

**C) Anti  $\alpha$ -tubulin**

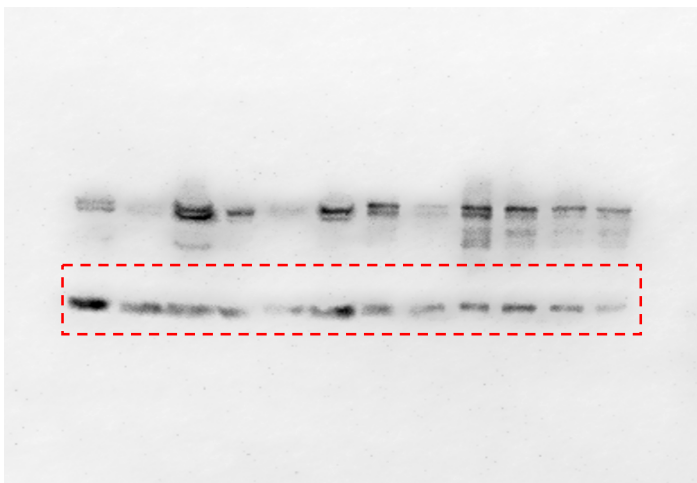

**Supplementary Figure 11. p62-mediated cleavage of TDP-43 is independent of caspases – blot images.** Lane order: soluble fractions from non-treated, caspase treated or calpain treated empty-vector transfected cells, soluble fractions from non-treated, caspase treated or calpain treated EGFP-p62 transfected cells, insoluble fractions in the same lane order. A) anti-RFP, B) anti-GFP, and C) anti- $\alpha$ -tubulin.

A) Anti-TDP-43

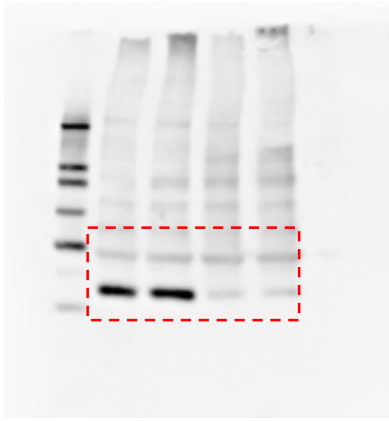

B) Anti-GFP

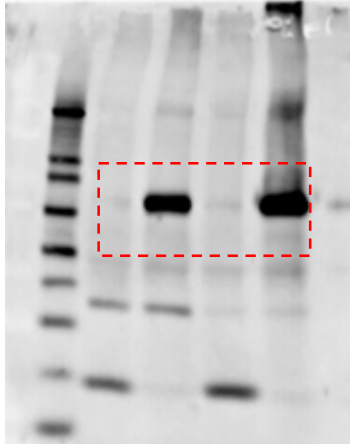

C) Anti- $\alpha$ -tubulin

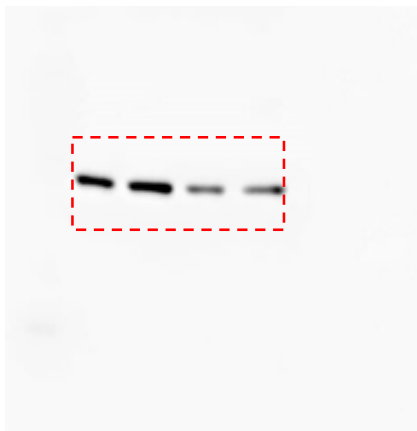

**Supplementary Figure 12. p62-mediated neuronal death is independent of TDP-43 expression – blot images. Lane order:** Lysates from cells transfected with pcDNA3.1 or EGFP-p62 and a genetools control, lysates from cells transfected with pcDNA3.1 or EGFP-p62 and a PMO to knockdown TDP-43 expression. A) anti-TDP-43, B) anti-GFP and C) anti- $\alpha$ -tubulin.

Soluble

Insoluble

A) Anti-RFP

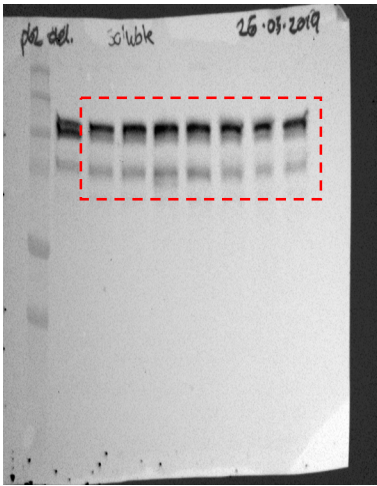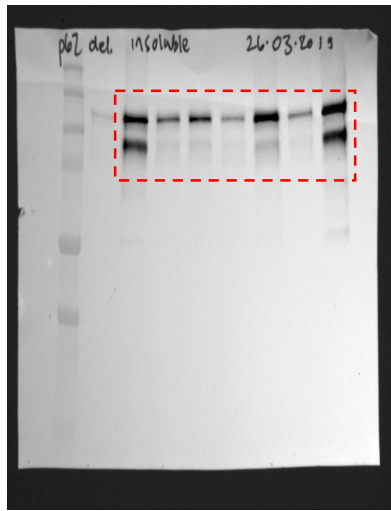

B) Anti-GFP

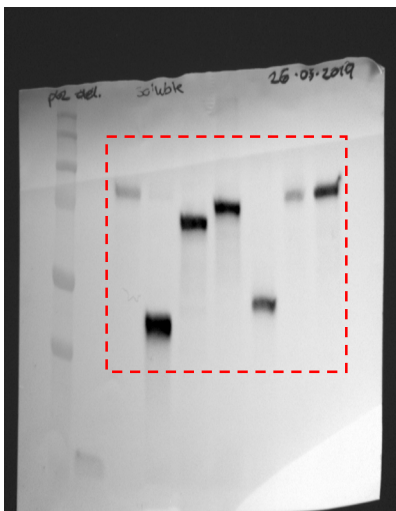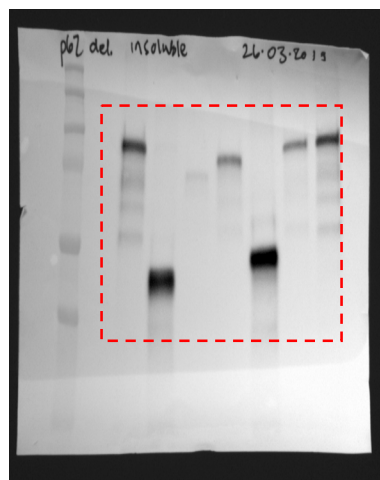

C) Anti- $\alpha$ -tubulin

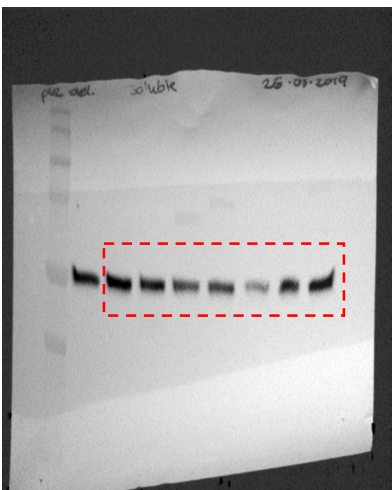

**Supplementary Figure 13. TDP-43 aggregation and cleavage require the PB1 and UBA domains, and the nuclear export signal of p62 – blot images.** Lane order: molecular weight marker, EGFP, EGFP-p62 wild type, EGFP-p62 PB1 only, EGFP-p62  $\Delta$ PB1, EGFP-p62  $\Delta$ UBA, EGFP-p62 PB1 and UBA only, EGFP-p62  $\Delta$ NES and EGFP-p62 K7A/D69A. A) anti-RFP (TDP-43), B) anti-GFP (p62) and C) anti- $\alpha$ -tubulin.

**a) *Stag2* exon 30b retention**

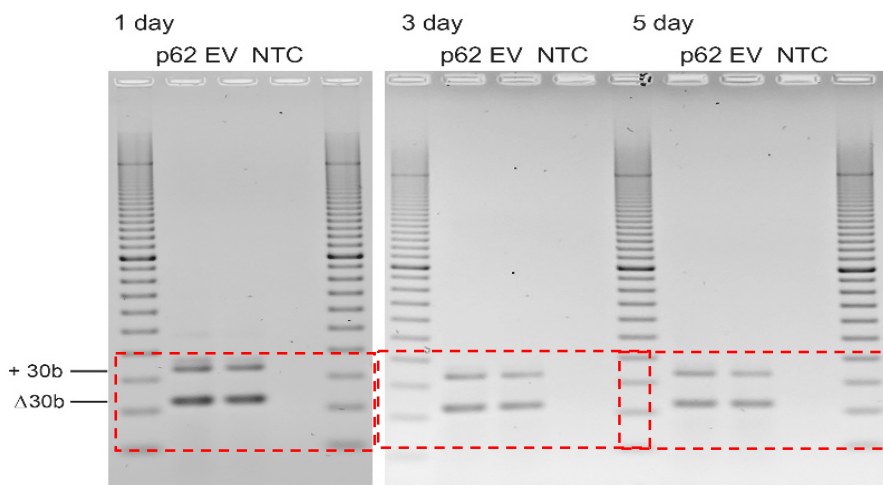

**b) *Poldip3* exon 3 skipping**

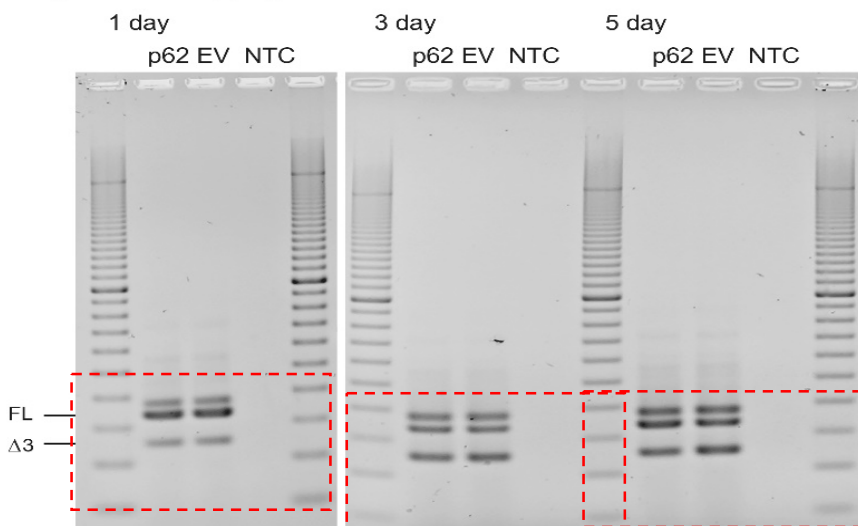

**c) *Madd* exon 31 skipping**

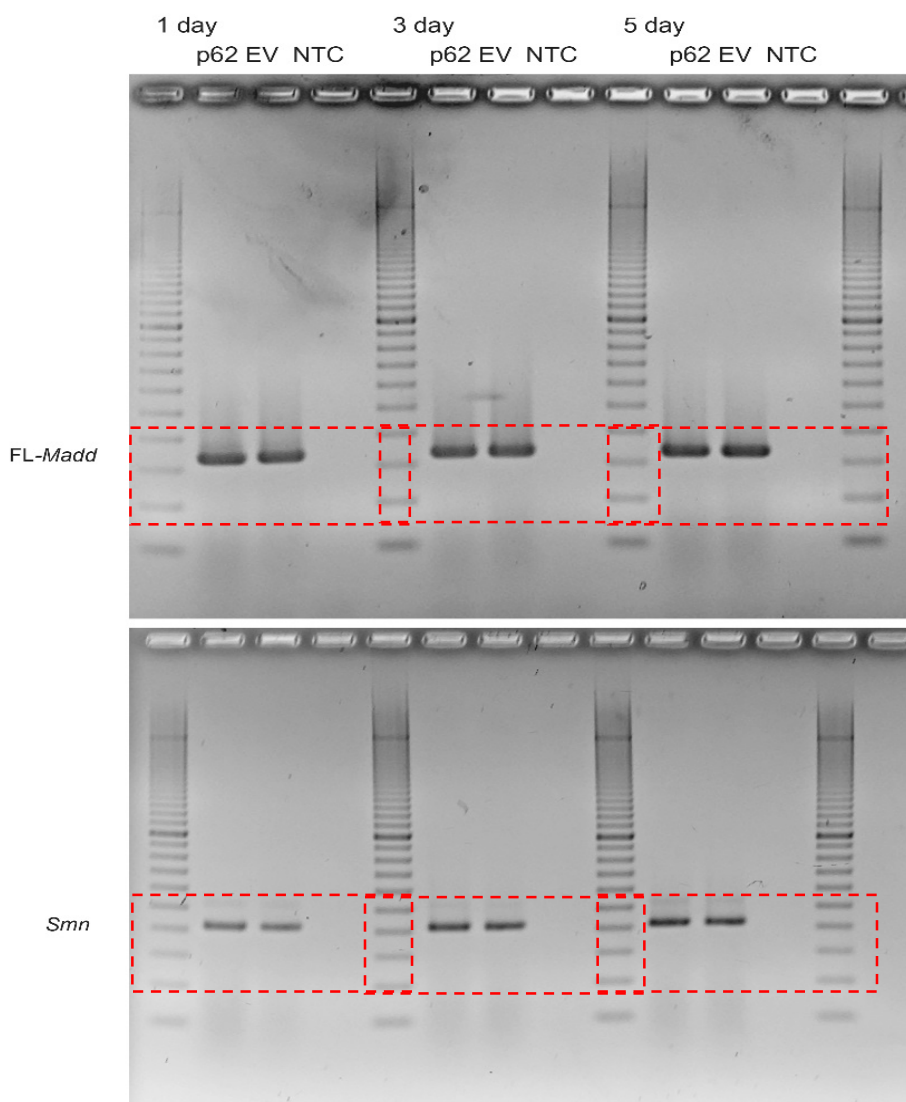

**Supplementary Figure 14. p62 overexpression leads to loss of TDP-43-mediated RNA regulation—gel images.** Lanes order as labelled. Please note that Day 1 PCRs for *Stag2* and *Poldip3* were run separately to Days 3 and 5. Images were subsequently cropped as shown for consistency within the final figure.
